# Supplementary material for: Clinical Profile and Risk Factors of Epilepsy Among Children in Buea and Limbe Regional Hospitals: A Hospital-Based Case-Control Study
Source: Research Square preprint supplement (doi:10.21203/rs.3.rs-8047786/v1), 2025-12-30
Supplement: Supplementary file 1 [file 3c355ea5bf00a9ec9855e6b6.docx]

**STRUCTURED QUESTIONNAIRE**

**PARTICIPANTS INFORMATION SHEET**

Title of study: **CLINICAL PROFILE AND RISK FACTORS OF EPILEPSY AMONG CHILDREN IN BUEA AND LIMBE REGIONAL HOSPITALS**

INTRODUCTION

My name is NONGMOH MARODINE TENDONGLEFACK. I am from the Faculty of Health Sciences, University Of Buea and the main investigator of this study. My contact is 670829025, [marodinenongmoh@gmail.com](mailto:marodinenongmoh@gmail.com)

My supervisors are;

PROF VERLA VINCENT SISYI : Faculty of Health Sciences University of Buea

DR NAIZA MONONO: pediatrics department, Faculty of Health Sciences University of Buea

Dear Sir/Miss/Madame

**INVITATION TO THE STUDY**

We kindly invite you to participate in this study. This study will permit us to determine the prevalence and risk factors of epilepsy among children in Buea and Limbe Regional Hospitals

**VOLUNTARY PARTICIPATION**

This study is strictly voluntary. You are free not to participate

**STUDY PROCEDURE**: If you decide to participate you will be asked some questions and also fill the questionnaire

**RISKS**: There are no risks involved in filling the questionnaire

**BENEFITS:** This study will help policy making bodies to improve on health facilities and human resources to curb the preventable risk factors of epilepsy

**CONFIDENTIALITY:** All information will be strictly confidential. The information will be coded and it will not carry the identity of the participant

**REIMBURSEMENT:** There shall be no payment to any participant of this study

OPPORTUNITY TO ASK QUESTIONS: If you have any question feel free to contact me

**CONSENT FORM**

I ………………………………………………………………………………………….have understood the study, after having the participant information sheet well explained to me, I have also been given an opportunity to ask question and time to consider my participation in the study, I have therefore agree to participate in this study

……………………………. …………………………..

Date /signature of investigator participants signature

NAME OF PARTICIPANT ……………………………….

TELEPHONE NUMBER……………………………………

ADDRESS…………………………………………………………

**QUESTIONNAIRE**

My name is Nongmoh Marodine Tendonglefack, from the Faculty of Health Sciences University of Buea and department of medicine. Our team currently conducting a study on CLINICAL PROFILE AND RISK FACTORS OF EPILEPSY AMONG CHILDREN IN BUEA AND LIMBE REGIONAL HOSPITALS. I will be grateful if you will take few minute of your time to answer the questions below. Be assured that this research will be used solely for academic purpose and your response will be treated confidentially

**Part 1: identification**

| **001** | **Initials of names . …………………………………….** |
| --- | --- |
| **002** | **Address ………………………….** |
| **003** | **Telephone number(parent or guardian) ……………………………………** |
| **004** | **Date of consultation -/ -/ - dd /mm/yr** |

**Part 2: Sociodemographic data of the child**

**Please fill the blank spaces provided, write the number of each response chosen in the box provided**

| **001** | **How old is your child?(date of birth)** | **…………….**  **-/ -/ - dd/mm/yr** |
| --- | --- | --- |
| **002** | **Is your child male or female**  **1-male 2-female** |  |
| **003** | **Where was your child born** | **……………** |
| **004** | **What level of education is your child**  **1-prenursary 2-nursary 3-primary 4-secondary 5-university 6-others** | **6……………..** |

**Part 3: Sociodemographic data of the guardians**

|  | **Age of guardian** | **…………………** |
| --- | --- | --- |
|  | **Tribe of guardian** | **………………..** |
|  | **Occupation of guardian** | **……………….** |

**Part 4: Clinical /Para clinical features/antiepileptic medications**

**This section is only for children diagnosed of epilepsy. Please do not fill this section if you (child)/your child has never been diagnosed of epilepsy**

**Please fill the blank spaces provided, write the number of the response chosen in the boxes provided**

|  | **Have you ever been diagnosed of epilepsy?**   - 1. **yes**   2. **no** | |  |
| --- | --- | --- | --- |
|  | **The child had the first epileptic seizure at what age?**   1. **0- 28days,** 2. **1month to 1year,** 3. **1years to 5years,** 4. **5 to 10years** 5. **above 10years** | |  |
|  | | **Type of seizure**   1. **Generalized (whole body moves)** 2. **Focal (just one part of the body)** 3. **Unknown (I cannot tell)** |  |
|  | **How long does the seizure usually last?** | | **……………………….** |
|  | **How many seizures has your child had or usually have in 24hours?** | | **……………………………………..** |
|  | **What was the state of your child after convulsing**  **1-awake, 2-asleep, 3-unconcious** | |  |
|  | **Has your child ever done an EEG?**  **1-Yes, 2-No**  **What were the EEG findings?** | | **……………………………………………………………………**  **…………………………………** |
|  | **Has your child ever done a CT scan?**  **What were the CT scan findings?** | | **…………………………………** |
|  | **What antiepileptic medication(s) is**  **Your child taking** | | **…………………………………** |

**Part 5: Personal and Family History**

**Please fill the blank spaces provided, write the number of the response chosen in the boxes provided**

|  | **Did your child have convulsion with fever when he /she was between the ages of 3months to 5years?**   1. **Yes** 2. **No**   **3-i don’t know** |  |
| --- | --- | --- |
|  | **Has your child had a head trauma before?**  **1-Yes**  **2- No**  **3-i don’t know** |  |
|  | **Has your child been diagnosed of meningitis before?**  **1-Yes**  **2-no**  **3-i don’t know** |  |
|  | **Was the child’s mother in labor for long before giving birth?**  **1-Yes**  On bivariate analysis, there was a significant association between guardians’ employment status and epilepsy but no significance on multivariate analysis. This could be because unemployed mothers are likely to deliver at less equipped hospitals due to financial constraints and hence are exposed to more preventable risk factors of epilepsy such as neonatal asphyxia than employed mothers.  **2-No**  **3-i don’t know** |  |
|  | **Was your child born premature?**  **1-Yes**  **2-No**  **3-i don’t know** |  |
|  | **Did your child cry immediately after birth?**  **1-Yes**  **2- No**  **3-I don’t know** |  |
|  | **Did your child have yellowish discoloration of the eyes and skin after birth?**  **1-yes**  **2-no**  **3-i don’t know** |  |
|  | **Was your child placed on oxygen after birth?**  **1-Yes**  **2-No**  **3-I don’t know** |  |
|  | **Is there any maternal or paternal relative with confirmed epilepsy?**  **1-Yes**  **2-no**  **3-i don’t know**  **If yes first degree or second degree relative?** | **………………………………….** |

**Part 6: Comorbidities associated with pediatric epilepsy**

|  | **Cerebral palsy**  **1-yes**  **2-No** |  |
| --- | --- | --- |
|  | **Developmental delay**  **1-yes**  **2-No** |  |
|  | **Malnutrition**  **1-yes**  **2-No** |  |
